# Supplementary material
Source: publisher figshare collection journal article supplement (https://gsajournals.figshare.com/ndownloader/files/12559973)
Supplement: Supplementary file 1 [file 12559973]

## Sheet: table.fisher.paper
	m75	m76	m77	m78	m79	m80	m81	m82	m83	m84	m85	m86	m87	m88	m89	m90
p-value	1.6348e-05	4.3962e-06	3.9302e-10	4.3041e-06	4.8941e-07	0.00103932	0.041926	0.067437	0.0066786	0.120878	0.71166	0.14168	0.079683	0.1891	0.43077	0.43077
Odds ratio	1.6034	1.6868	2.0951	1.8796	2.1315	1.7678	1.5048	1.4753	1.8429	1.4925	0.7797	0.2183	0	0	0	0
No binding - No tracheal	16915	17965	19149	20424	21157	21529	21831	22021	22229	22451	22644	22832	22922	22949	22995	22995
No binding - Tracheal	242	259	268	308	321	340	353	358	358	368	378	383	384	384	384	384
Binding - No tracheal	6190	5140	3956	2681	1948	1576	1274	1084	876	654	461	273	183	156	110	110
Binding - Tracheal	142	125	116	76	63	44	31	26	26	16	6	1	0	0	0	0
